# Supplementary material for: Pharmacogenetics of OATP Transporters Reveals That SLCO1B1 c.388A>G Variant Is Determinant of Increased Atorvastatin Response
Source: Int J Mol Sci. 2011 Sep 9;12(9):5815–27. doi: 10.3390/ijms12095815 (PMC3189752; doi:10.3390/ijms12095815)

## Supplementary Information

Alice C. Rodrigues <sup>1,\*</sup>, Paula M. S. Perin <sup>1</sup>, Sheila G. Purim <sup>2</sup>, Vivian N. Silbiger <sup>1</sup>, Fabiana D. V. Genvigir <sup>1</sup>, Maria Alice V. Willrich <sup>1</sup>, Simone S. Arazi <sup>1</sup>, Andre D. Luchessi <sup>1</sup>, Mario H. Hirata <sup>1</sup>, Marcia M. S. Bernik <sup>3</sup>, Egidio L. Dorea <sup>3</sup>, Carla Santos <sup>4,5</sup>, Andre A. Faludi <sup>6</sup>, Marcelo C. Bertolami <sup>6</sup>, Antonio Salas <sup>5</sup>, Ana Freire <sup>5</sup>, Maria V. Lareu <sup>5</sup>, Christopher Phillips <sup>5</sup>, Liliana Porras-Hurtado <sup>5</sup>, Manuel Fondevila <sup>5</sup>, Angel Carracedo <sup>5</sup> and Rosario D. C. Hirata <sup>1</sup>

<sup>1</sup> Faculty of Pharmaceutical Sciences, University of Sao Paulo, Sao Paulo 05508-900, Brazil; E-Mails: paulamsp@gmail.com (P.M.S.P.); viviansilbiger@hotmail.com (V.N.S.); fdallavecchia@yahoo.com.br (F.D.V.G.); malicewi@usp.br (M.A.V.W.); sisorkin@usp.br (S.S.A.); adluchessi@uol.com.br (A.D.L.); mhhirata@usp.br (M.H.H.); rosariohirata@usp.br (R.D.C.H.)

<sup>2</sup> Life Technologies, Sao Paulo 04311-000, Brazil; E-Mail: sheila.purim@lifetech.com

<sup>3</sup> University Hospital, University of Sao Paulo, Sao Paulo 05508-000, Brazil; E-Mails: mbernik@usp.br (M.M.S.B.); egidiodr@gmail.com (E.L.D.)

<sup>4</sup> Department of Biology, University of Aveiro, Aveiro 3810-193, Portugal; E-Mail: carla.santo@ispa.pt

<sup>5</sup> Forensic Genetics Unit, Institute of Legal Medicine, University of Santiago de Compostela, Galicia 15705, Spain; E-Mails: antonio.salas@usc.es (A.S.); ana.freire@usc.es (A.F.); mvictoria.lareu@usc.es (M.V.L.); christopherpaul.phillips@usc.es (C.P.); glolipo@gmail.com (L.P.-H.); manuel.fondevila@usc.es (M.F.); apimlang@usc.es (A.C.)

<sup>6</sup> Dante Pazzanese Institute, Sao Paulo 04012-909, Brazil; E-Mail: afaludi@uol.com.br (A.A.F.); bertolami@uol.com.br (M.C.B.)

\* Author to whom correspondence should be addressed; E-Mail: alice-rodrigues@usp.br; Tel.: +55-11-3091-3660; Fax: +55-11-3813-2197.

*Received: 29 July 2011; in revised form: 29 August 2011 / Accepted: 30 August 2011 /*

*Published: 9 September 2011*

---

**Abstract:** Aims: The relationship between variants in *SLCO1B1* and *SLCO2B1* genes and lipid-lowering response to atorvastatin was investigated. Material and Methods: One-hundred-thirty-six unrelated individuals with hypercholesterolemia were selected and treated with atorvastatin (10 mg/day/4 weeks). They were genotyped with a panel of ancestry informative markers for individual African component of ancestry (ACA) estimation by SNaPshot<sup>®</sup> and *SLCO1B1* (c.388A>G, c.463C>A and c.521T>C) and *SLCO2B1* (-71T>C) gene polymorphisms were identified by TaqMan<sup>®</sup> Real-time PCR. Results: Subjects

carrying *SLCO1B1* c.388GG genotype exhibited significantly high low-density lipoprotein (LDL) cholesterol reduction relative to c.388AA+c.388AG carriers (41 vs. 37%,  $p = 0.034$ ). Haplotype analysis revealed that homozygous of *SLCO1B1*\*15 (c.521C and c.388G) variant had similar response to statin relative to heterozygous and non-carriers. A multivariate logistic regression analysis confirmed that c.388GG genotype was associated with higher LDL cholesterol reduction in the study population (OR: 3.2, CI95%:1.3–8.0,  $p < 0.05$ ). Conclusion: *SLCO1B1* c.388A>G polymorphism causes significant increase in atorvastatin response and may be an important marker for predicting efficacy of lipid-lowering therapy.

**Keywords:** OATP; atorvastatin; single nucleotide polymorphisms; pharmacogenetics

**Table 1S.** Frequency of the minor alleles of *SLC* polymorphisms according to ACA quartiles in the Brazilian sample.

| ACA       | SLCO1B1                              |                                      | SLCO2B1                              |                                        |
|-----------|--------------------------------------|--------------------------------------|--------------------------------------|----------------------------------------|
|           | c.388G>A<br>G allele                 | c.521T>C<br>C allele                 | c.463C>A<br>A allele                 | –71 T>C<br>C allele                    |
| <0.25     | 0.63                                 | 0.14                                 | 0.26                                 | 0.54                                   |
| 0.25–0.50 | 0.61                                 | 0.06                                 | 0.23                                 | 0.39                                   |
| 0.50–0.75 | 0.81                                 | 0.06                                 | 0.06                                 | 0.37                                   |
| >0.75     | 0.70                                 | 0                                    | 0                                    | 0.10                                   |
|           | ( $\chi^2 = 2.311$ ,<br>$p = 0.51$ ) | ( $\chi^2 = 2.421$ ,<br>$p = 0.49$ ) | ( $\chi^2 = 5.823$ ,<br>$p = 0.12$ ) | ( $\chi^2 = 7.9851$ ,<br>$p = 0.046$ ) |

ACA: African component ancestry. P:  $p$ -value, as compared by Chi-Square test.

**Figure 1S.** Comparison of African Ancestral Component (ACA) mean values between the alleles of *SLCO1B1* and *SLCO2B1* polymorphisms. p: *p*-value, as compared by *t*-test.

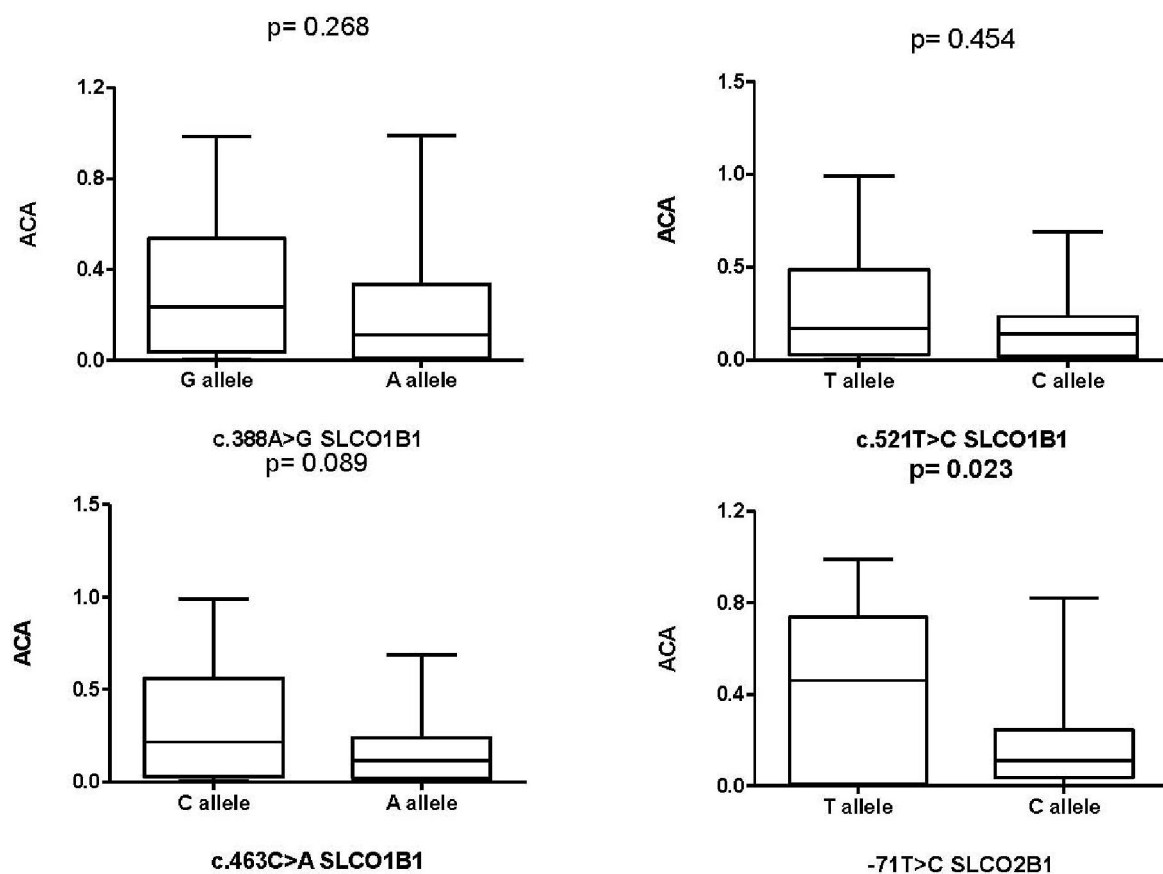

Supplement: Supplementary file 1 [file ijms-12-05815-s001.pdf]
